# Supplementary material for: Photoentrainment in blind and sighted rodent species: responses to photophase light with different wavelengths
Source: Oxford University Press journal article supplement (doi:10.1242/jeb.048629), 2010-11-26
Supplement: jeb048629tables1.pdf [file jeb048629tables1.pdf]

Table S1. Factorial and cosinor analyses of urine production rates in two rodent species, *Microtus socialis* and *Spalax ehrenbergi*, under different light spectra

|                      | One-way ANOVA<br>( $F_{6,42}$ ; $P$ ) | $\tau$<br>(h) | Mesor<br>(ml 100g <sup>-1</sup> h <sup>-1</sup> ) | Amplitude<br>(ml 100g <sup>-1</sup> h <sup>-1</sup> ) | Acrophase<br>(hh:mm)                | PR<br>(%) | $F_{2,6}$ ; $P$  |
|----------------------|---------------------------------------|---------------|---------------------------------------------------|-------------------------------------------------------|-------------------------------------|-----------|------------------|
| <i>M. socialis</i>   |                                       |               |                                                   |                                                       |                                     |           |                  |
| Short wavelength     | 1.12; 0.37                            | 24            | 0.66 (0.59–0.74) <sup>a</sup>                     | 0.28 (0.22–0.34)                                      | 23:40<br>(21:40–01:36)              | 70        | 79.91;<br>0.0001 |
| Long wavelength      | 1.05; 0.47                            | 24            | 0.26 <sup>b</sup>                                 | 0.12                                                  | 00:16                               | 9         | 8.36; 0.08       |
| <i>S. ehrenbergi</i> |                                       |               |                                                   |                                                       |                                     |           |                  |
| Short wavelength     | 66.79; 0.0001                         | 24            | 0.98 (0.88–1.07)                                  | 0.43 (0.29–0.57)                                      | 01:18<br>(00:10–02:28) <sup>a</sup> | 59        | 16.46; 0.004     |
| Long wavelength      | 5.25; 0.001                           | 12            | 0.95 (0.83–1.07)                                  | 0.32 (0.15–0.51)                                      | 00:12<br>(00:01–00:37) <sup>b</sup> | 54        | 32.12; 0.03      |

$\tau$ , period length of the cosine curve approximated by spectral analysis; PR, percentage of the rhythm (represents the proportion of the total variance of the data accounted by the cosine approximation of a trial period).

The zero amplitude hypothesis was rejected at  $P < 0.05$ . Different letters represent significant differences between treatments for each species ( $P < 0.05$ ).

Values in brackets for mesor, amplitude and acrophase are 95% confidence intervals (CI) of the group mean. CI values are not listed when  $P > 0.05$ .
