# Supplementary material for: Photoentrainment in blind and sighted rodent species: responses to photophase light with different wavelengths
Source: Oxford University Press journal article supplement (doi:10.1242/jeb.048629), 2010-11-26
Supplement: jeb048629tables2.pdf [file jeb048629tables2.pdf]

Table S2. Factorial and cosinor analyses of urinary 6-sulfatoxymelatonin (6-SMT) in two rodent species, *Microtus socialis* and *Spalax ehrenbergi*, under different light spectra

|                      | One-way ANOVA<br>( $F_{6,36}$ ; $P$ ) | $\tau$<br>(h) | Mesor<br>(ng ml <sup>-1</sup> ) | Amplitude<br>(ng ml <sup>-1</sup> ) | Acrophase<br>(hh:mm)                | PR<br>(%) | $F_{2,5}$ ; $P$ |
|----------------------|---------------------------------------|---------------|---------------------------------|-------------------------------------|-------------------------------------|-----------|-----------------|
| <i>M. socialis</i>   |                                       |               |                                 |                                     |                                     |           |                 |
| Short wavelength     | 19.42; 0.0001                         | 24            | 3.70 (3.28–4.11) <sup>a</sup>   | 1.84 (1.23–2.64) <sup>a</sup>       | 02:49<br>(01:38–03:59) <sup>a</sup> | 68        | 31.63; 0.001    |
| Long wavelength      | 1.66; 0.16                            | 8             | 1.72 (1.45–2.02) <sup>b</sup>   | 0.49 (0.05–1.12) <sup>b</sup>       | 06:58<br>(05:59–08:31) <sup>b</sup> | 48        | 6.70; 0.03      |
| <i>S. ehrenbergi</i> |                                       |               |                                 |                                     |                                     |           |                 |
| Short wavelength     | 5.05; 0.001                           | 24            | 1.32 (1.15–1.51) <sup>a</sup>   | 0.51 (0.25–0.77) <sup>a</sup>       | 19:04<br>(16:52–21:20) <sup>a</sup> | 61        | 6.66; 0.04      |
| Long wavelength      | 9.72; 0.0001                          | 12            | 3.38 (3.04–3.72) <sup>b</sup>   | 1.59 (1.13–2.04) <sup>b</sup>       | 01:48<br>(00:52–02:44) <sup>b</sup> | 66        | 21.61; 0.004    |

$\tau$ , period length of the cosine curve approximated by spectral analysis; PR, percentage of the rhythm (represents the proportion of the total variance of the data accounted by the cosine approximation of a trial period).  
 The zero amplitude hypothesis was rejected at  $P<0.05$ . Different letters represent significant differences between treatments for each species ( $P<0.05$ ).  
 Values in brackets for mesor, amplitude and acrophase are 95% confidence intervals (CI) of the group mean.
