# Supplementary material for: Photoentrainment in blind and sighted rodent species: responses to photophase light with different wavelengths
Source: Oxford University Press journal article supplement (doi:10.1242/jeb.048629), 2010-11-26
Supplement: jeb048629tables4.pdf [file jeb048629tables4.pdf]

Table S4. Factorial and cosinor analyses of urinary metabolites of cortisol (UMCort) in two rodent species, *Microtus socialis* and *Spalax ehrenbergi*, under different light spectra

|                      | One-way ANOVA<br>( $F_{6,36}; P$ ) | $\tau$<br>(h) | Mesor<br>(pg ml <sup>-1</sup> g <sup>-1</sup> ) | Amplitude<br>(pg ml <sup>-1</sup> g <sup>-1</sup> ) | Acrophase<br>(hh:mm)   | PR<br>(%) | $F_{2,5}; P$ |
|----------------------|------------------------------------|---------------|-------------------------------------------------|-----------------------------------------------------|------------------------|-----------|--------------|
| <i>M. socialis</i>   |                                    |               |                                                 |                                                     |                        |           |              |
| Short wavelength     | 0.1; 0.44                          | 12.9          | 33.4 (27.3–39.5) <sup>a</sup>                   | 6.31 (1.95–14.6)                                    | 08:02<br>(05:55–10:08) | 49        | 9.37; 0.04   |
| Long wavelength      | 5.34; 0.0001                       | 24            | 59.4 (51.4–67.4) <sup>b</sup>                   | 20.4 (9.37–31.3)                                    | 10:04<br>(07:48–12:24) | 43        | 11.68; 0.01  |
| <i>S. ehrenbergi</i> |                                    |               |                                                 |                                                     |                        |           |              |
| Short wavelength     | 0.18; 0.98                         | 12            | 49.0                                            | 1.56                                                | 08:58                  | 37        | 0.17; 0.84   |
| Long wavelength      | 6.39; 0.0001                       | 24            | 11.5 (9.24–13.8)                                | 4.89 (1.46–8.32)                                    | 02:39<br>(00:06–05:24) | 43        | 10.42; 0.02  |

$\tau$ , period length of the cosine curve approximated by spectral analysis; PR, percentage of the rhythm (represents the proportion of the total variance of the data accounted by the cosine approximation of a trial period).

The zero amplitude hypothesis was rejected at  $P<0.05$ . Different letters represent significant differences between treatments for each species ( $P<0.05$ ).

Values in brackets for mesor, amplitude and acrophase are 95% confidence intervals (CI) of the group mean. CI values are not listed when  $P>0.05$ .
