# Supplementary material for: Photoentrainment in blind and sighted rodent species: responses to photophase light with different wavelengths
Source: Oxford University Press journal article supplement (doi:10.1242/jeb.048629), 2010-11-26
Supplement: jeb048629tables5.pdf [file jeb048629tables5.pdf]

Table S5. Factorial and cosinor analyses of daily rhythms in oxygen consumption ( $\text{VO}_2$ ) of two rodent species, *Microtus socialis* and *Spalax ehrenbergi*, under different light spectra

|                      | One-way ANOVA<br>( $F_{48,336}$ ; $P$ ) | $\tau$<br>(h) | Mesor<br>(ml 100 g <sup>-1</sup> h <sup>-1</sup> ) | Amplitude<br>(ml 100 g <sup>-1</sup> h <sup>-1</sup> ) | Acrophase (hh:mm)                | PR<br>(%) | $F_{2,6}$ ; $P$ |
|----------------------|-----------------------------------------|---------------|----------------------------------------------------|--------------------------------------------------------|----------------------------------|-----------|-----------------|
| <i>M. socialis</i>   |                                         |               |                                                    |                                                        |                                  |           |                 |
| Short wavelength     | 2.27; 0.0001                            | 24            | 1.84 (1.81–1.87) <sup>a</sup>                      | 0.16 (0.11–0.20) <sup>a</sup>                          | 19:44 (18:36–20:52) <sup>a</sup> | 73        | 4.75; 0.001     |
| Long wavelength      | 3.98; 0.02                              | 24            | 2.72 (2.64–2.80) <sup>b</sup>                      | 0.37 (0.25–0.48) <sup>b</sup>                          | 20:36 (18:20–20:52) <sup>a</sup> | 43        | 4.04; 0.04      |
|                      |                                         | 12            |                                                    | 0.25 (0.08–0.32) <sup>a</sup>                          | 07:06 (05:52–08:20) <sup>b</sup> | 23        | 9.11; 0.01      |
| <i>S. ehrenbergi</i> |                                         |               |                                                    |                                                        |                                  |           |                 |
| Short wavelength     | 4.03; 0.02                              | 24            | 3.13 (3.07–3.19) <sup>a</sup>                      | 0.30 (0.22–0.39) <sup>a</sup>                          | 05:46 (04:39–06:52) <sup>a</sup> | 45        | 7.02; 0.001     |
| Long wavelength      | 2.42; 0.04                              | 24            | 1.92 (1.81–2.02) <sup>c</sup>                      | 0.52 (0.37–0.66) <sup>b</sup>                          | 04:38 (03:33–05:44) <sup>a</sup> | 30        | 2.44; 0.001     |
|                      |                                         | 12            |                                                    | 0.39 (0.24–0.53) <sup>a,b</sup>                        | 03:50 (03:04–04:34) <sup>b</sup> | 22        | 2.10; 0.001     |

$\tau$ , period length of the cosine curve approximated by spectral analysis; PR, percentage of the rhythm (represents the proportion of the total variance of the data accounted by the cosine approximation of a trial period).

The zero amplitude hypothesis was rejected at  $P < 0.05$ . Different letters represent significant differences between treatments for each species ( $P < 0.05$ ).

Values in brackets for mesor, amplitude and acrophase are 95% confidence intervals of the group mean.
